# Supplementary material for: Validation of the IASI FORLI/Eumetsat ozone products usingsatellite (GOME-2), ground-based (Brewer-Dobson, SAOZ) andozonesonde measurements
Source: Copernicus journal article supplement (doi:10.5194/amt-2017-461), 2018-01-22
Supplement: Supplementary file [file amt-2017-461-AC2-supplement.pdf]

## Response to Referee #2

**The authors would like to thank the referee for her/his constructive and detailed comments, which have helped us clarifying several points and improving the manuscript. Below are our responses to the comments brought up by the referee. Referee's comments and our replies are marked in blue and in black, respectively. In italic are the changes made in the manuscript.**

### General comments

The manuscript titled "Validation of the IASI FORLI/Eumetsat ozone products using satellite (GOME-2), ground-based (Brewer-Dobson, SAOZ) and ozonesonde measurements" give a thorough validation study of 9 years of IASI ozone measurement. The manuscript is well written, clear and easy to read.

However, it is not easy to understand whether this paper (Boynard et al., 2017) presents novel concepts, ideas, tools or data, especially when we compare Boynard et al. (2017) to Boynard et al. (2016). Many conclusions in Boynard et al. (2016) and in Boynard et al. (2017) are similar.

Were the authors expecting different results between IASI v20140922 and v20151001? According to Boynard et al. (2016), the improvement of IASI retrieval was already found to be mainly located in the middle stratosphere. How much could the bias assessment change with 2 more years of data? 9 years of data allow the authors to address the long-term stability of IASI. This is the most interesting and the newest part of the study. Unfortunately the significant drift in the troposphere is barely explained and addressed.

Boynard et al. (2016) validated IASI data processed with the previous version of FORLI (v20140922) on a global scale over 7 years of data (2008-2014), and showed a constant bias in the TOCs between IASI and other datasets, of the order of 4-6%, depending on the datasets. Some draft corrections were implemented in FORLI, and preliminary comparisons limited to only 12 days, showed an improvement of 2-4% compared to the former FORLI version, which is mainly related to an improvement in the middle stratosphere (Boynard et al., 2016). Since the data retrieved using FORLI-O<sub>3</sub> v20151001 will become the official Eumetsat product in 2018, it is required to validate the full available IASI dataset and not only 12 days taken randomly, which is not representative of all atmospheric conditions. Furthermore, in the framework of European projects such as CCI and C3S projects focusing on building consolidated climate-relevant ozone data sets as essential climate variables (ECVs), it is necessary to validate satellite data for a long-time period, which is one of the goal of the current manuscript.

For clarity purpose, in the revised manuscript, we better explain the goal of this manuscript in the introduction. We quantify in detail the improvements of the new version of FORLI v20151001 in comparison with the previous one v20140922. The new version allows to remove the systematic bias that was identified with the former version. Local discrepancies identified earlier persist e.g. at high latitudes, and over mountain region and desert. that couldn't be fixed with the current version but quality flags allow to filter them if needed.

Here are the changes made in the revised manuscript:

### Introduction:

"This O<sub>3</sub> retrieval algorithm (FORLI-O<sub>3</sub> v20151001) is currently being implemented into the Eumetsat processing facility under the auspices of the Ozone and Atmospheric Composition Monitoring Satellite Application Facility (AC SAF) project in order to operationally distribute Level-2 IASI O<sub>3</sub> profiles to users through the EumetCast system in 2018. *IASI Level-2 and Level-3 O<sub>3</sub> products processed with FORLI v20151001 are part of the European*

*Space Agency O<sub>3</sub> Climate Change Initiative (Ozone\_cci, www.esa-ozone-cci.org) and the European Centre for Medium-Range Weather Forecasts (ECMWF) Copernicus Climate Change (C3S) projects, respectively, which focus on building consolidated climate-relevant ozone data sets as essential climate variables (ECVs). Therefore, validating the latest version of the IASI O<sub>3</sub> products over a long-time period and assessing their stability are necessary for decadal trend studies, model simulation evaluation and data assimilation applications. This is one of the main motivations of the present work. The goals of the Ozone\_cci project are described in Garane et al. (2018) and its requirements in term of satellite product stability, which is defined to 1 – 3% / decade based on the requirements formulated by the Global Climate Observing System (GCOS) and the Climate Modeling User Group (CMUG) climate modelling community for ozone is detailed in Van Weele et al. (2016)."*

GOME-2 comparison section:

*"Globally, IASI-A (IASI-B) TOC product are slightly higher than GOME-2A TOC product, with a global mean bias of 0.3±0.8 % (0.4±0.8 %). It is worth noting that the previous IASI TOC product (v20140922) was in disagreement by more than 5 % (Boynard et al., 2016). The global mean bias is now within total errors of GOME-2 estimated to 3-7 % (Valks et al., 2017) and IASI (e.g. Boynard et al., 2009), which demonstrates the good consistency between IASI and GOME-2 TOC products."*

Brewer/Dobson comparison section:

*"Nevertheless the overall comparison with Dobson and Brewer TOCs shows that IASI new TOC product is improved by 4% in comparison with the previous IASI TOC product (v20140922; see Boynard et al. (2016)) and is within IASI and GB TOC total error bars."*

SAOZ comparison section:

*"The results are consistent with those found for the comparison with GOME-2A along with Brewer and Dobson measurements (see Sections 5.1 and 5.2, respectively). An improvement of 3-4 % is found when compared to the previous IASI product (v20140922)."*

Ozonesonde comparison section:

*"In comparison with the previous IASI partial ozone column products reported in Boynard et al. (2016), the new IASI ozone product is significantly improved in the MS by 8-12 % for the mid latitudes and tropics. The improvement is less significant for the LMS except in Antarctic where an improvement of 6 % is found. As for the TROPO and UTLS columns, no or slight improvement (<2 %) is found, and the agreement between IASI and sonde data is even worse compared to the previous IASI ozone product, especially for the southern tropical TROPO column (by 7 %) and the UTLS column (by 10-18 %)."*

As highlighted by the referee a novel part of this manuscript is the study of the long-term stability of IASI, which is essential for long-term analysis of stratospheric and tropospheric ozone, such a decadal trend studies, model simulation evaluation and data assimilation applications. A significant and surprising drift has been found in the IASI tropospheric dataset for the period 2008-2016. When considering the period 2011 – 2016, the drift value for the TROPO column decrease and become statistically insignificant. However, since this difference in the drift values might be due only to the too short periods considered here associated with the high variability in TROPO O<sub>3</sub> differences, a few more years are needed to confirm the observed negative drifts and evaluate it on the longer term.

Another new in this manuscript (compared to Boynard et al. 2016) is the assessment of the significant difference in L1 data between IASI-A and IASI-B between April and September 2015, which was not possible to show in

Boynard et al. (2016) since the validation period extended from 2008 through 2014.

Furthermore, Boynard et al. (2017) didn't address open questions already mentioned in the conclusions of Boynard et al. (2016), such as the large bias found in the UTLS, still not fully understood.

We now address this question in the new Section on IASI/FTIR comparison as follows:

*“It should be noted that IASI is positively biased in the UTLS region, as reported in previous studies (e.g. Dufour et al., 2012; Gazeaux et al., 2013). Although Dufour et al. (2012) attempted to give some explanations for this particular feature, the exact reason for this overestimation is still not clear. One reason could be the use of inadequate a priori information. Note that FORLI uses only one single a priori profile (Hurtmans et al., 2012) that is the global mean profile of the McPeters/Labow/Logan climatology (McPeters et al., 2007). As shown by Bak et al. (2013), using tropopause-based ozone profile climatology can significantly improve the a priori. However, using dynamical a priori makes the comparison on a global scale less straightforward since a different a priori profile would be used at each IASI pixel.”*

For these reasons, I would suggest major corrections before the current manuscript can be published in AMT.

Specific comment:

- Section 3: Intercomparison between IASI-A and IASI-B ozone products

Line 18 p. 5: Change “the figure” to “Figure 2”

We changed “the figure” by “Fig. 2” according to AMT guidelines.

Line 2 p. 6: Change “then” to “October 2015”

We have made the change.

Line 14 p. 6: April-October 2015 shouldn't be included in the combined IASI-A/IASI-B product (as explained in Line 10), because of instrumental issues on IASI-A. Should this time-period be excluded from any time-series studies with IASI-A?

It depends on the interest of the user. If the user wants to analyze the total ozone column from IASI-A, he has to be aware of that issue but it is worth noting that the total column is only affected by 0.4%, which is well below the ozone column retrieval error, estimated to ~2% globally. Furthermore, Wespes et al. (2018) who performed tropospheric ozone trend study did not exclude this short 6-month period, which is relatively short over the 10 years of IASI-A data and therefore is not supposed to affect the calculation of the trend in tropospheric ozone. The instrumental issues on IASI-A affect the tropospheric ozone up to 10%, however again this is lower than error bars for tropospheric ozone, estimated to 20% globally.

We added the following paragraphs to the revised manuscript:

Section 4:

“The excellent agreement between the current IASI-A and IASI-B TOC and TROPO O<sub>3</sub> columns (April – September 2015 excluded) allows the combined use of IASI-A and IASI-B instruments to provide homogeneous total and tropospheric ozone data with full daily global coverage measurements. *Even if for the period April – September 2015, IASI-B O<sub>3</sub> products are better recommended for a high quality use, it is worth noting that the*

*IASI-A instrumental issue only affects the TOC by 0.4% and the tropospheric ozone by 10%, which are much lower than the TOC and tropospheric retrieval errors estimated to 2 % and 15 % on average, respectively, justifying the potential use of the IASI-A data over that period if it is required. In the validation exercise presented in the next section, the period April-September 2015 is included.”*

#### Summary:

*“However, it is worth noting that the impact of IASI-A instrumental issue is within the TOC and TROPO O<sub>3</sub> column total error bars. In case of using IASI-A data only, the user is free to include or exclude the period April – October 2015 depending on the interest of the study.”*

#### - Section 4: Validation of IASI-A and IASI-B total ozone columns

I would suggest to move all the validation method in one method section. The method section could then include: (1) the formulae of differences calculation, (2) The method of co-location between IASI and reference observations, (3) the characteristics of the data used for the comparison. This change would help the authors to shorten several sub-sections.

We followed the referee’s suggestion. The revised manuscript includes the following new sections:

- **2. IASI measurements and independent datasets used for the validation:** which describes the IASI O<sub>3</sub> retrievals as well as the independent measurements used for the validation
- **3. Comparison methodology:** this section includes the formulae of difference calculation as well as the different comparison methods (including the co-location criteria) used in the present work.

Line 25-27 p. 7: This statement is almost word to word the same as in Boynard et al. (2016). Don’t the author think that “Further investigation would be needed to understand the reasons of these larger differences at high latitude” should be addressed in the current study?

As explained before, this manuscript validates a different product from Boynard et al. (2016) study. A detailed analysis was undertaken for individual ground-based station located in Antarctic and desert regions characterized by larger biases. However this analysis examining the dependency of the relative differences on the parameters available in FORLI outputs (viewing zenith angle, Root-Mean\_Square Error, TOC error, distance from the ground station and DOFS) was not concluding. Actually, the stations located in desert show a confusing behavior with positive (Tamanrasset) and negative (Aswan and Springkok) biases of 7 -8 % and 4-5%, respectively. As for Antarctica, four stations were examined: the bias is extremely high for Amundsen-Scott located at 90° S and 3 km altitude (20%) and less, but still positive, for the other three ice-covered stations Haley-Bay, Syowa, Arrival-Heights (1.2 -3.8 %). The comparison of GOME-2A with ground-based TOCs at Amundsen-Scott shows a bias of 1-2 % indicating there is no issue in the ground-based measurements. Furthermore the scatter plot for that particular station (compared to either Dobson or Brewer) shows that IASI-A has a much higher variability than the ground-based measured TOC values. A future work will be initiated with different groups involved in validation studies in order to further examine the origin of the bias for the location of interest (Antarctica, mountain and desert region), taking into account the measurement dependence on surface emissivity as well as other parameters.

We rephrased this part as follows:

*“Despite the global improvement of ~5% with the new IASI TOC product with respect to the previous IASI TOC product (v20140922), large discrepancies are still observed at high latitudes and are partly explained by:*

- i) the low spectral signal to noise ratio due to very low surface temperature in this region leading to limited information content in the IASI observations in these regions;*
- ii) a misrepresentation of the wavenumber-dependent surface emissivity, which is a critical input parameter to describe the surface, especially above continental surfaces (Hurtmans et al., 2012).*

*FORLI uses the emissivity climatology built by Zhou et al. (2011) providing weekly emissivity values on a 0.5°x0.5° latitude/longitude grid for all 8461 IASI spectral channels. However, Zhou et al. climatology can have missing values. In such cases, the MODIS climatology built by Wan (2006), which provides values for only 12 channels in the IASI spectral range is used instead. Furthermore, in case of no correspondence between the IASI pixel and either climatologies, the reference emissivity used for the Zhou climatology (Zhou et al., 2011) is used, which can significantly impact the retrievals, in particular in arid or semi-arid regions where variations in emissivity are large both on spectral and spatial scales (Capelle et al., 2012) but also in ice region since the reference emissivity does not necessarily reflect the actual snow or sea ice coverage;*

- iii) the temperature profiles used in FORLI-O<sub>3</sub> that are less reliable at high latitudes and over elevated terrain (August et al., 2012). As shown in Boynard et al. (2009), the errors introduced by the uncertainties of 2 K on the temperature profile can reach up to 10% of total error on the retrieved vertical profile, with the error due to the temperature uncertainty on the TOCs being much lower. Errors on thermal contrast can also have an impact on the retrievals.*
- iv) the errors associated with TOC retrievals in the UV-vis spectral range increasing at high solar zenith angles in these regions, mostly because of the larger sensitivity of the retrieval to the a priori O<sub>3</sub> profile shape (Lerot et al., 2014).*

*In the section below, a detailed analysis of the larger bias found in the Antarctic region is undertaken for individual ground-based Brewer and Dobson station to try to understand the larger bias (see next section)."*

Furthermore, we added a description of the detailed analysis undergone for individual ground-based station in the Brewer/Dobson section:

*"To further examine the large discrepancies mentioned above, we have analyzed in more details the results obtained for individual stations located in Antarctic and desert regions. The stations located near desert areas show an diverging behavior with positive (Tamanrasset, Algeria) and negative (Aswan, Egypt and Springbok, South Africa) biases of +7 to +8% and -5 to -4%, respectively. Over Antarctica, four stations were examined: the bias was found to be extremely high for Amundsen-Scott located at 90° S and 3 km altitude (20%) and less, but still positive, for the other three stations Haley-Bay, Syowa, Arrival-Heights (1.2 – 3.8 %) located on the Antarctic Ice Sheet. The comparison of GOME-2A with ground-based TOCs at Amundsen-Scott shows a very small bias of 1-2%, indicating there is no obvious issue with the ground-based measurements. Furthermore, the scatter plot for that particular station (compared to either Dobson or Brewer; plot not shown) shows that IASI-A has a much higher variability than the GB TOC values. This issue has still to be further explored by investigating, for instance, the impact of potential surface emissivity discrepancies on the retrievals over some regions of Antarctica and deserts. Additional quality filters, e.g. on ice surface emissivity issues, could also be considered."*

[Line 33 p. 7: Would it be possible to quantify the "better agreement"?](#)

The agreement is better by ~5%. We added the following sentence to the revised manuscript as follows:

*"It is worth noting that the previous IASI TOC product (v20140922) was in disagreement by more than 5 % (Boynard et al. , 2016). The global mean bias is now within total errors of GOME-2 estimated to 3-7 % (Valks et al., 2017) and IASI (e.g. Boynard et al., 2009), which demonstrates the good consistency between IASI and GOME-2 TOC products."*

Following a comment of Referee #1, we better quantify the improvements of the new version of FORLI in comparison with the previous version in the revised manuscript. We also highlight the fact that the improvement is rather constant over the globe and therefore issues are still persisting over some regions such as high latitudes, mountain and desert regions.

Lines 3-11 p. 8: All this paragraph is already stated in Boynard et al. (2016). It could be either removed or shortened. As suggested by the referee, we removed this paragraph and Figure 8.

Line 10 p. 8: Would it be possible to quantify the “magnitude”?

The paragraph has been removed as suggested by the previous referee’s comment.

Line 28 p. 8: Could you explain why the number of stations would influence the dependency on the latitude of the differences between IASI and GB measurements?

As discussed in the manuscript, the mean difference for each 10° latitude bin is calculated using all percentage daily differences between GB and satellite measurements located in the respective bin. In the Southern Hemisphere there are bins that include only a few stations, so if one or two of them is not in great agreement with the satellite measurements, the mean value of the whole bin appears to deviate strongly from the 0% line. This is not the case for the Northern Hemisphere, where many stations contribute to each latitude bin and the incompatibility of one or two of them would not have a strong influence on the latitude mean.

We changed this sentence to:

*“As shown by the IASI-to-Dobson comparison (left panel), the dependency on latitude is less visible for the NH due to the high number of collocations which renders the latitudinal means more representative compared to the SH.”*

Line 29 p. 8: The differences between IASI-A and Dobson seem to reach 3.5% in NH, while the authors report [0-2.5%]

We made the correction and the sentence has been changed as follows:

*“The comparisons with Dobson measurements show differences between 0 and 2.5 % for the entire NH (except in the 70-80°N belt where difference reaches 3.5 % for IASI-A) and for latitudes ranging between 0° and 40° S. ”*

Line 30 p. 8: “Lower than 40°S” would mean somewhere between 0 and 40°S. Do you mean between 40°S and 60°S? Please clarify.

We have changed “lower” by “*Southwards of*”.

Line 1 p. 9: It is worth to notice there is no Brewer measurements in SH.

Actually there are Brewer stations in the SH, but they are not evenly distributed. We changed the sentence to:

*“A similar picture for the NH is observed for the comparison with Brewer measurements. Note that there are a few Brewer stations in the SH, but they are not evenly distributed (all of them are located on the Antarctic) so their measurements are not used.”*

Line 2 p. 9: Change “belt” to “region”.

Done.

Lines 5-6 p. 9: Could you explicitly mention the 1-3% requirement from the Ozone\_cci project instead of “within ±3%”:

We changed “within 3%” by “*among 1 and 3%*”.

Line 11 p. 9: Change “small” to “< 3%”.

Done.

Lines 12-13 p. 9: In the (new) method section I would suggest to explain the ozone\_cci project and their requirement in term of satellite products stability. Could you explain how the 1-3% requirement has been decided? According to the 1-3% requirement, “IASI-A TOC products are reliable for trend studies”. Does it mean no drift adjustment at all is required? And does it mean that the drift, even small, is not taken into account in the ozone trends uncertainties? Could you please explain?

The Ozone\_cci project is fully described in Garane et al. (2018, this issue) and their requirement in term of satellite product stability are detailed in Van Weele et al. (2016). We now refer to both references in the introduction of the revised manuscript as follows:

*“This O<sub>3</sub> retrieval algorithm (FORLI-O<sub>3</sub> v20151001) is currently being implemented into the Eumetsat processing facility under the auspices of the Ozone and Atmospheric Composition Monitoring Satellite Application Facility (AC SAF) project in order to operationally distribute Level-2 IASI O<sub>3</sub> profiles to users through the EumetCast system in 2018. It is therefore essential to validate the full available IASI dataset and not only 12 days taken randomly, which is not representative of all atmospheric conditions as it was performed in Boynard et al. (2016). Furthermore, IASI Level-2 and Level-3 O<sub>3</sub> products processed with FORLI v20151001 are part of the European Space Agency O<sub>3</sub> Climate Change Initiative (Ozone\_cci, [www.esa-ozone-cci.org](http://www.esa-ozone-cci.org)) and the ECMWF Copernicus Climate Change (C3S), respectively, which focus on building consolidated climate-relevant ozone data sets as essential climate variables (ECVs). Therefore, validating the latest version of the IASI O<sub>3</sub> products over a long-time period and assess their stability are necessary before using the data for scientific applications such as assimilation or trend studies. This is one of the main motivations of the present work. The goals of the Ozone\_cci project are described in Garane et al. (2018) and its requirements in term of satellite product stability, which is defined to 1 – 3% / decade based on the requirements formulated by the Global Climate Observing System (GCOS) and the Climate Modeling User Group (CMUG) climate modelling community for ozone is detailed in Van Weele et al. (2016).”*

As for the comment on drift adjustment, the Ozone\_cci project is responsible for producing long term homogenized ozone data sets, which can (but might not) have a maximum of 1-3% drift. It is not the responsibility of the Ozone\_cci data providers to correct for any drift within or higher than this limit, if this exists.

Line 13 p. 9: Which criteria is used to qualify differences “within 1.1%” as “very good agreement”?

We removed the word “very”.

Lines 16-20 p. 9: This paragraph is not clear. It is hard to understand what would explain differences in the seasonal variability between Dobson and Brewer. What does 0.6% represent?

The 0.6% difference represents the expected difference between TOC measurements from Brewer and Dobson spectrometers.

The paragraph was rephrased as follows:

*“Fig. 10 shows a good agreement between IASI-A and GB measurements (mean differences within 1.1%), with an obvious seasonal variability in the differences: the smallest differences appear in summer and the largest differences in winter. In the Dobson comparison the seasonal variability is more evident, which is explained by the fact the TOC measurements from Dobson spectrometers depend strongly on the stratospheric effective temperature (Koukouli et al., 2016). We can also see a similar but less pronounced seasonality effect in the Brewer comparison. According to Garane et al. (2018) and references therein, even though Dobson and Brewer spectrometers follow almost the same principles of operation, TOC measurements from the two types of instruments show differences in the range of  $\pm 0.6\%$  due to the use of different wavelengths in their respective TOC algorithms and the different*

*temperature dependence for the ozone absorption coefficients. However it is worth noting that these differences between Brewer and Dobson TOCs are lower than their total uncertainty (~1%). The mean difference for the NH is lower than 1.1 % for both Dobson and Brewer comparisons to the IASI observations.”*

- Section 5: Validation of IASI-A and IASI-B partial ozone column products

As mention for Section 4, I would suggest to move the comparison method in one method section.

We followed the referee’s suggestion.

Line 16 p.10: Could you report the numbers of the “small or non-significant negative decadal trends”?

We changed the sentence to:

*“The IASI-A and SAOZ TOC relative differences show small or insignificant negative decadal trends ranging between  $-0.02 \pm 0.65\%$  (OHP) and  $-2.06 \pm 0.66\%$  (Reunion), except for Bauru station. The good quality of the IASI-A TOC temporal stability satisfies well the 1 – 3% decade<sup>-1</sup> Ozone\_cci requirements for the long-term stability for total ozone measurements (Van Weele et al., 2016), which shows again that the current IASI-A TOC products are homogeneous and reliable for trend studies.”*

Lines 16-17 p.10: Could you refer again to the 1-3% requirement with the reference of the Ozone\_cci project?

The sentence has been changed as follows:

*“The good quality of the IASI-A TOC temporal stability satisfies well the 1 – 3% decade<sup>-1</sup> Ozone\_cci requirements for the long-term stability for total ozone measurements (Van Weele et al., 2016), which shows again that the current IASI-A TOC products are homogeneous and reliable for trend studies.”*

Line 27 p. 10: “[...] their uncertainties are lower than other types of ozonesondes [...]” Could you quantify?

The sentence has been changed as follows:

*“Their accuracy is generally good ( $\pm 3-5\%$ ) and their uncertainties are of about 10% throughout most of the profile below 28 km (Deshler et al., 2008; Smit et al., 2007), while other types of ozonesondes have somewhat poorer accuracy (5-10%), (e.g. Hassler et al., 2014; Liu et al., 2013).”*

Lines 6-12 p. 11: The common method to compare satellite data with ozonesondes is to degrade the high vertically resolved ozonesondes by applying the AKs and a priori ozone profiles used to retrieve satellite ozone products. In Huang et al. (2017), they use the high vertically resolved ozonesondes (without degrading the vertical resolution) in the regions and altitudes when the satellite has low retrieval sensitivity. Could you comment on this? Is such analysis could be done in your study?

Huang, G., Liu, X., Chance, K., Yang, K., Bhartia, P. K., Cai, Z., Allaart, M., Ancellet, G., Calpini, B., Coetzee, G. J. R., Cuevas-Agulló, E., Cupeiro, M., De Backer, H., Dubey, M. K., Fuelberg, H. E., Fujiwara, M., Godin-Beekmann, S., Hall, T. J., Johnson, B., Joseph, E., Kivi, R., Kois, B., Komala, N., König-Langlo, G., Laneve, G., Leblanc, T., Marchand, M., Minschwaner, K. R., Morris, G., Newchurch, M. J., Ogino, S. Y., Ohkawara, N., Piders, A. J. M., Posny, F., Querel, R., Scheele, R., Schmidlin, F. J., Schnell, R. C., Schrems, O., Selkirk, H., Shiotani, M., Skrivánková, P., Stübi, R., Taha, G., Tarasick, D. W., Thompson, A. M., Thouret, V., Tully, M. B., Van Malderen, R.,

Vömel, H., von der Gathen, P., Witte, J. C., and Yela, M.: Validation of 10-year SAOOMI Ozone Profile (PROFOZ) product using ozonesonde observations, Atmos. Meas. Tech., 10, 2455-2475, 10.5194/amt-10-2455-2017, 2017.



In the framework of a validation study, it is appropriated and recommended to use the averaging kernels to take into account the differences in the sensitivity profiles. Indeed, comparing raw products as performed by Huang et al. (2017) is interesting, however IASI profiles have much less vertical information than ozonesonde profiles and thus a direct comparison is not recommended. Furthermore, a direct comparison between raw products only gives an indication on the sensitivity but does not affirm there is a lack of sensitivity. It is clear that if there is no sensitivity the smoothed profile will reproduce the *a priori* profile and therefore this is not interesting to analyze these cases for validation purpose.

In some cases, it is clear that the lack of information implies that the smoothed ozonesonde approaches the *a priori*, which does not offer any interest for validation purpose. However, as shown in the figure below illustrating the comparison between IASI-A against smoothed (blue) and raw (red) ozonesonde data, the smoothed data does not reproduce the *a priori* in case of low DOFS, which means that a minimum of information is brought by IASI. We chose to not add this figure in the paper given that first IASI and sonde data have significantly different sensitivity profiles and, second, IASI always has a minimum of sensitivity that justifies the use of AK for the comparison. To indicate if there is sensitivity or not, comparing raw and smoothed data does not allow to indicate if there is sensitivity or not but DOFS gives this information. The DOFS are indicated in Figure 14 of the manuscript so that the reader can know the region/altitude characterized by low sensitivity. We recommend to give less attention and interest to comparison results when IASI presents no sensitivity.

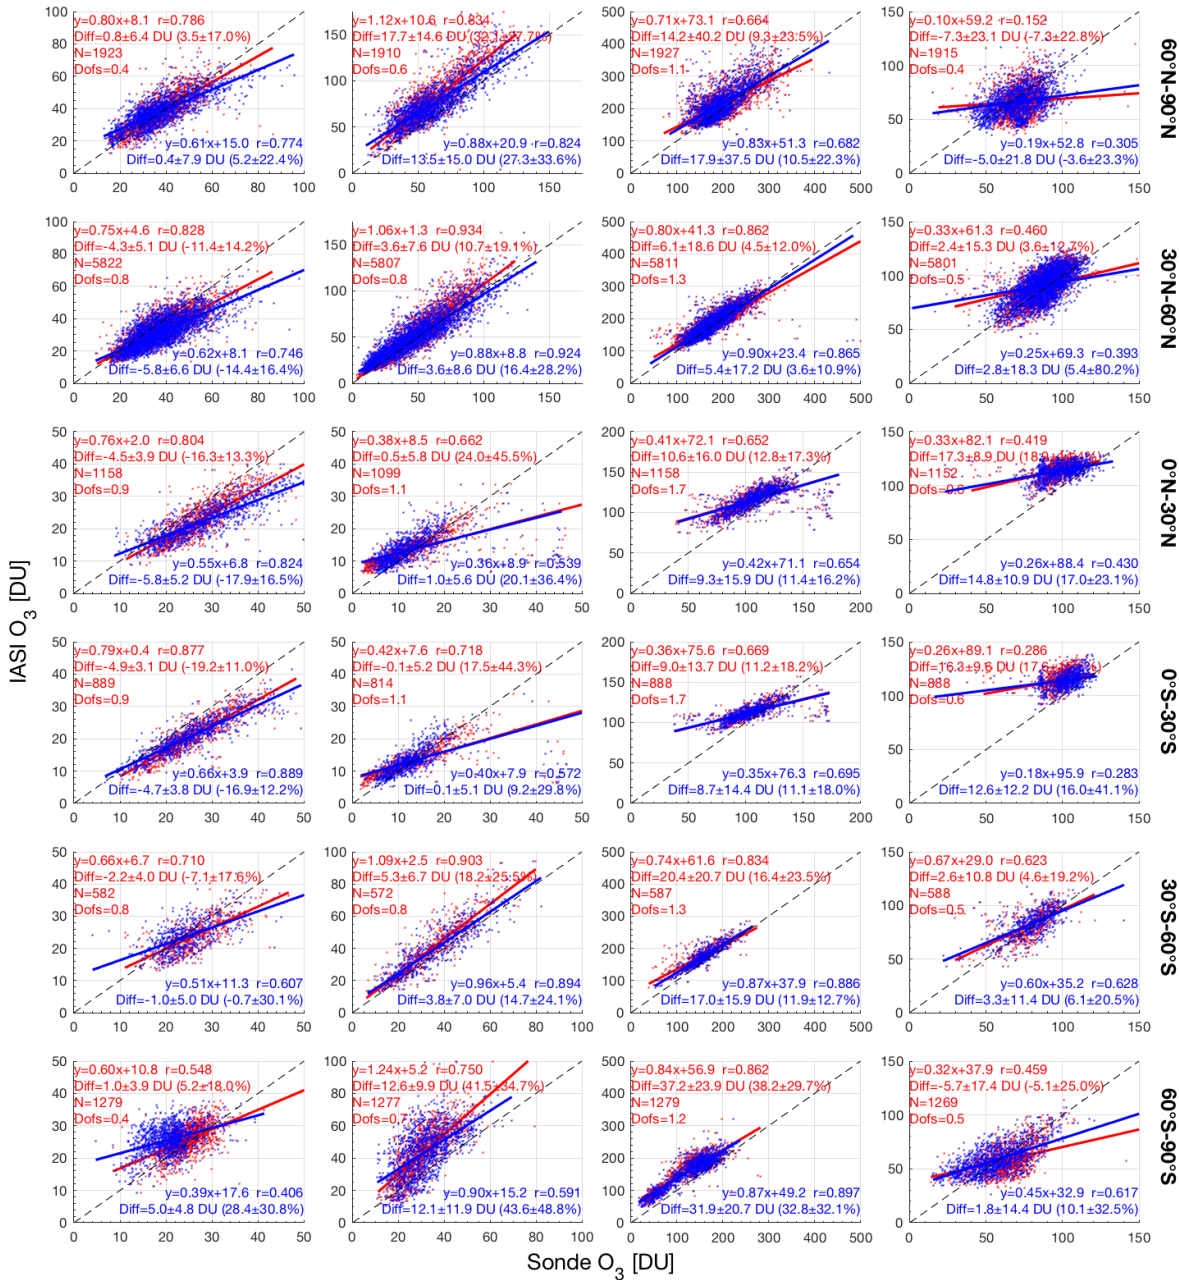

Figure: Scatter plots of IASI-A against smoothed (red) and raw (blue) sonde O<sub>3</sub> partial columns for six latitude bands for the period January 2008 – July 2017. Comparison statistics including the linear regression, the mean differences and standard deviation in both Dobson units and percent, the number of collocations and the mean DOFS for each partial column are shown on each panel.

Lines 18 and 31 p. 12: The selection of the ozonesondes stations are confusing. Why don't you use all the ozonesondes stations that meet the criteria needed for the comparison such as long-term time series, statistics of

the data, etc: : :?

Figure 14 just illustrated a sample of time series of IASI and smoothed ozonesonde data for six stations representative of different latitude bands and with data available over the period 2008 – 2017.

In order to avoid spurious effects due to incomplete annual cycle and/or characterized with too short temporal coverage, only time series of eight years or longer are used for the assessment of IASI-A temporal stability. As shown in the figure below, several ozonesonde stations are characterized by too short temporal coverage or incomplete annual cycle, and including these stations in the drift calculation will bias the results.

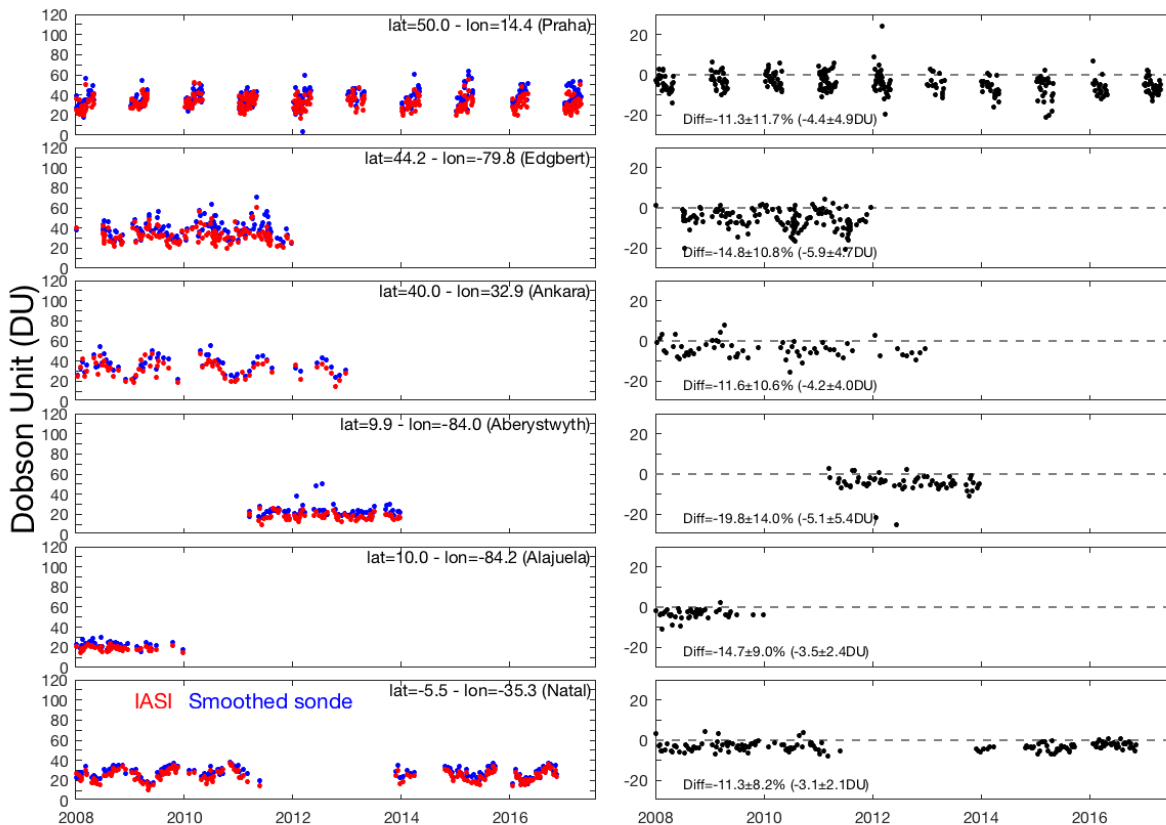

Figure: (left panels) Time series of daily IASI-A (in red) and smoothed ozonesonde (in blue) TROPO  $O_3$  columns for six stations characterized by incomplete annual cycle or too short temporal coverage between 2008 – 2017; (right panels) Associated relative differences (in percent), including the mean differences and 1-sigma standard deviation.

We rephrased Line 30-31 p.12 to:

*“The long-term stability of IASI-A partial  $O_3$  column vs ozonesonde measurements is assessed in Figure 16, which presents the monthly relative differences between IASI-A and ozonesonde for the TROPO, UTLS, LMS and MS  $O_3$  partial columns for a total of 18 ozonesonde stations in the NH that cover eight years or longer (over 2008 – 2017). With more than 30 IASI-sonde pairs per month, the NH presents sufficient collocated data to assess a good*

*statistical drift analysis on the contrary to the SH (only 8 ozonesonde stations)."*

Lines 14-24 p. 13: This part of the discussion is one of the most interesting but it is too short. Would it be possible to address at least one of the speculative explanation for such a drift?

The ozonesonde-to-IASI comparison shows that the drift values calculated for two different periods (2008 – 2016 and 2011 – 2016) differ. Since the difference in the drift values between the two periods might be due only to the too short periods considered here (9 years or less) associated with the high variability in the TROPO O<sub>3</sub> differences, a few more years are needed to confirm the observed negative drifts and evaluate it on the longer term. Another possible but speculative explanation for this drift in the TROPO is the changes in the IASI Eumetsat L2 dataset version over the IASI time period. However we do not prefer to include this explanation in the manuscript because it is very speculative and cannot be confirmed without using homogeneous L2 dataset, which is planned for the future (it takes 2 years to reprocess the whole IASI data record).

These lines have been changes to:

*"Note that for the TROPO column, the drift calculated for each individual station ranges between -16 % decade<sup>-1</sup> and -5 % decade<sup>-1</sup>, which is the same order of magnitude of those found in the IASI-A to FTIR TROPO comparison. If we limit the time period to 2011 –2016, no statistically significant drift is found anymore for the TROPO and MS (P value >0.47). However, since this difference in the drift values might be due only to the too short time periods considered here associated with the high variability in the TROPO O<sub>3</sub> differences, a few more years are needed to confirm the observed negative drifts and evaluate it on the longer term."*

- Summary

Line 4 p. 14: Would you suggest to remove the data between April and September 2015 (October 2015 in the main text) for trends studies? If so, could you mention it? Would it be possible to apply any corrections factor on the data for this time-period?

It depends on the interest of the user. If the user wants to analyze the total ozone column from IASI-A, he has to be aware of that issue but it is worth noting that the total column is only affected by 0.4%, which is well below total ozone column total error, estimated to 2% globally. Furthermore, Wespes et al. (2018) who performed tropospheric ozone trend study did not exclude this short 6-month period, which is relatively short over the 10 years of IASI-A data and therefore is not supposed to affect the calculation of the trend in tropospheric ozone. The instrumental issues on IASI-A affect the tropospheric ozone up to 10%, however again this is lower than error bars for tropospheric ozone, estimated to 20% globally.

We added the following sentence to the revised manuscript:

*"In case of using IASI-A data only, the user is free to include or exclude the period April – October 2015 depending on the interest of the study."*

Line 12-14 p. 14: What do you mean by "due to larger differences at the southern high latitudes"? The sentence is not clear.

We changed the sentence to:

*"There is a pronounced seasonality in the differences in the SH, with the largest differences found during the austral summer (up to 4 %) and related to larger differences at the southern high latitudes."*

Line 20 p. 14: Could you report the numbers for "insignificant negative trends"? Do you refer to the P-value for "insignificant"?

For “insignificant”, we refer to both the 2-sigma standard deviation and P-value. We changed the sentence to:  
“*The time series of relative differences between IASI-A against UV-vis GB TOCs show insignificant negative drift in the NH ( $0.68 \pm 0.69$  % decade<sup>-1</sup> and P-value= 0.05) and small negative trend in the SH ( $1.48 \pm 0.53$ % decade-1 and P-value=0.00), which satisfies the 1 – 3 % decade<sup>-1</sup> Ozone\_cci requirements for stability of ozone measurements. Similar results are found with the IASI-A/FTIR TOC comparison.*”

Line 25 p. 14: The statement about the large biases found in the UTLS was already mentioned in Boynard et al. (2016), but still it is not fully understood. Could you address this question in your study?

We added this paragraph in the new IASI/FTIR section:

*“It should be noted that IASI is positively biased in the UTLS region, as reported in previous studies (e.g. Dufour et al., 2012; Gazeaux et al., 2013). Although Dufour et al. (2012) attempted to give some explanations for this particular feature, the exact reason for this overestimation is still not clear. One reason could be the use of inadequate a priori information. Note that FORLI uses only one single a priori profile (Hurtmans et al., 2012) that is the global mean profile of the McPeters/Labow/Logan climatology (McPeters et al., 2007). As shown by Bak et al. (2013), using tropopause-based ozone profile climatology can significantly improve the a priori. However, using dynamical a priori makes the comparison on a global scale less straightforward since a different a priori profile would be used at each IASI pixel”*

We also added the following paragraph in the summary:

*“Attempt of explanations for the larger bias found in the UTLS are given in Dufour et al. (2012) but no clear reason was found. A possible explanation could be the use of inadequate a priori information in that layer. The current version of FORLI uses as a priori profile a single global profile that is the mean of the McPeters/Labow/Logan climatology (McPeters et al., 2007). As shown by Bak et al. (2013), using tropopause-based ozone profile climatology can significantly improve the a priori. However, using dynamical a priori makes the comparison on a global scale less straightforward to analyze because the retrieval at each IASI pixel would be based on different a priori profiles.”*
